# Supplementary material for: Inositol Phosphoryl Transferase, Ipt1, Is a Critical Determinant of Azole Resistance and Virulence Phenotypes in Candida glabrata
Source: MDPI journal article supplement (doi:10.3390/jof8070651), 2022-06-21
Supplement: s1 [file s1]

## Legends of supplementary data

**Table S1. List of strains used in the study.**

**Figure S1. Drug susceptibility analysis of WT,  $\Delta Cgip1$  and  $\Delta Cgip1::IPT1$  strains using the spot assay. (A-B)** Drug susceptibility to KTZ, MCZ, CTZ, FLC, ITR and PCZ and other xenobiotics was determined by spot assay.

**Figure S2. Drug susceptibility analysis of WT and  $\Delta Cgskn1$  strains.** Drug susceptibility was determined by spot assay.

**Figure S3. PCA analysis of lipid species dataset of WT and  $\Delta Cgip1$ .** (A) Principal components 1 and 2 account for as much as 88% variance in the datasets. (B) PCA loading plot representing the contribution to individual lipid species to the overall variance is shown.

**Supplementary sheet S1. Comparative lipidomic data of WT,  $\Delta Cgip1$  and  $\Delta Cgskn1$  strains.** Data represented in nmol per mg lipid dry wt (n=3).
