# Supplementary material for: Inositol Phosphoryl Transferase, Ipt1, Is a Critical Determinant of Azole Resistance and Virulence Phenotypes in Candida glabrata
Source: MDPI journal article supplement (doi:10.3390/jof8070651), 2022-06-21
Supplement: s1 [file s1]

Table S1

List of strains used in the study

| Strain                 | Genotype                                             | Source     |
|------------------------|------------------------------------------------------|------------|
| WT                     | BG2                                                  | Lab stock  |
| <i>ΔCgipt1</i>         | <i>ΔCgipt1::NAT1</i>                                 | This study |
| <i>ΔCgskn1</i>         | <i>ΔCgskn1::NAT1</i>                                 | This study |
| <i>Cgipt1/Cgskn1ΔΔ</i> | BG14, <i>ΔCgipt1::FRT/ΔCgskn1::NAT1</i>              | This study |
| <i>ΔCgipt1::IPT1</i>   | <i>ΔCgipt1::nat1</i> , with plasmid pGRB2.3_hph_ipt1 | This study |
