# Supplementary figures and images for: Inositol Phosphoryl Transferase, Ipt1, Is a Critical Determinant of Azole Resistance and Virulence Phenotypes in Candida glabrata
Source: MDPI journal article supplement (doi:10.3390/jof8070651), 2022-06-21

**Figure S1**

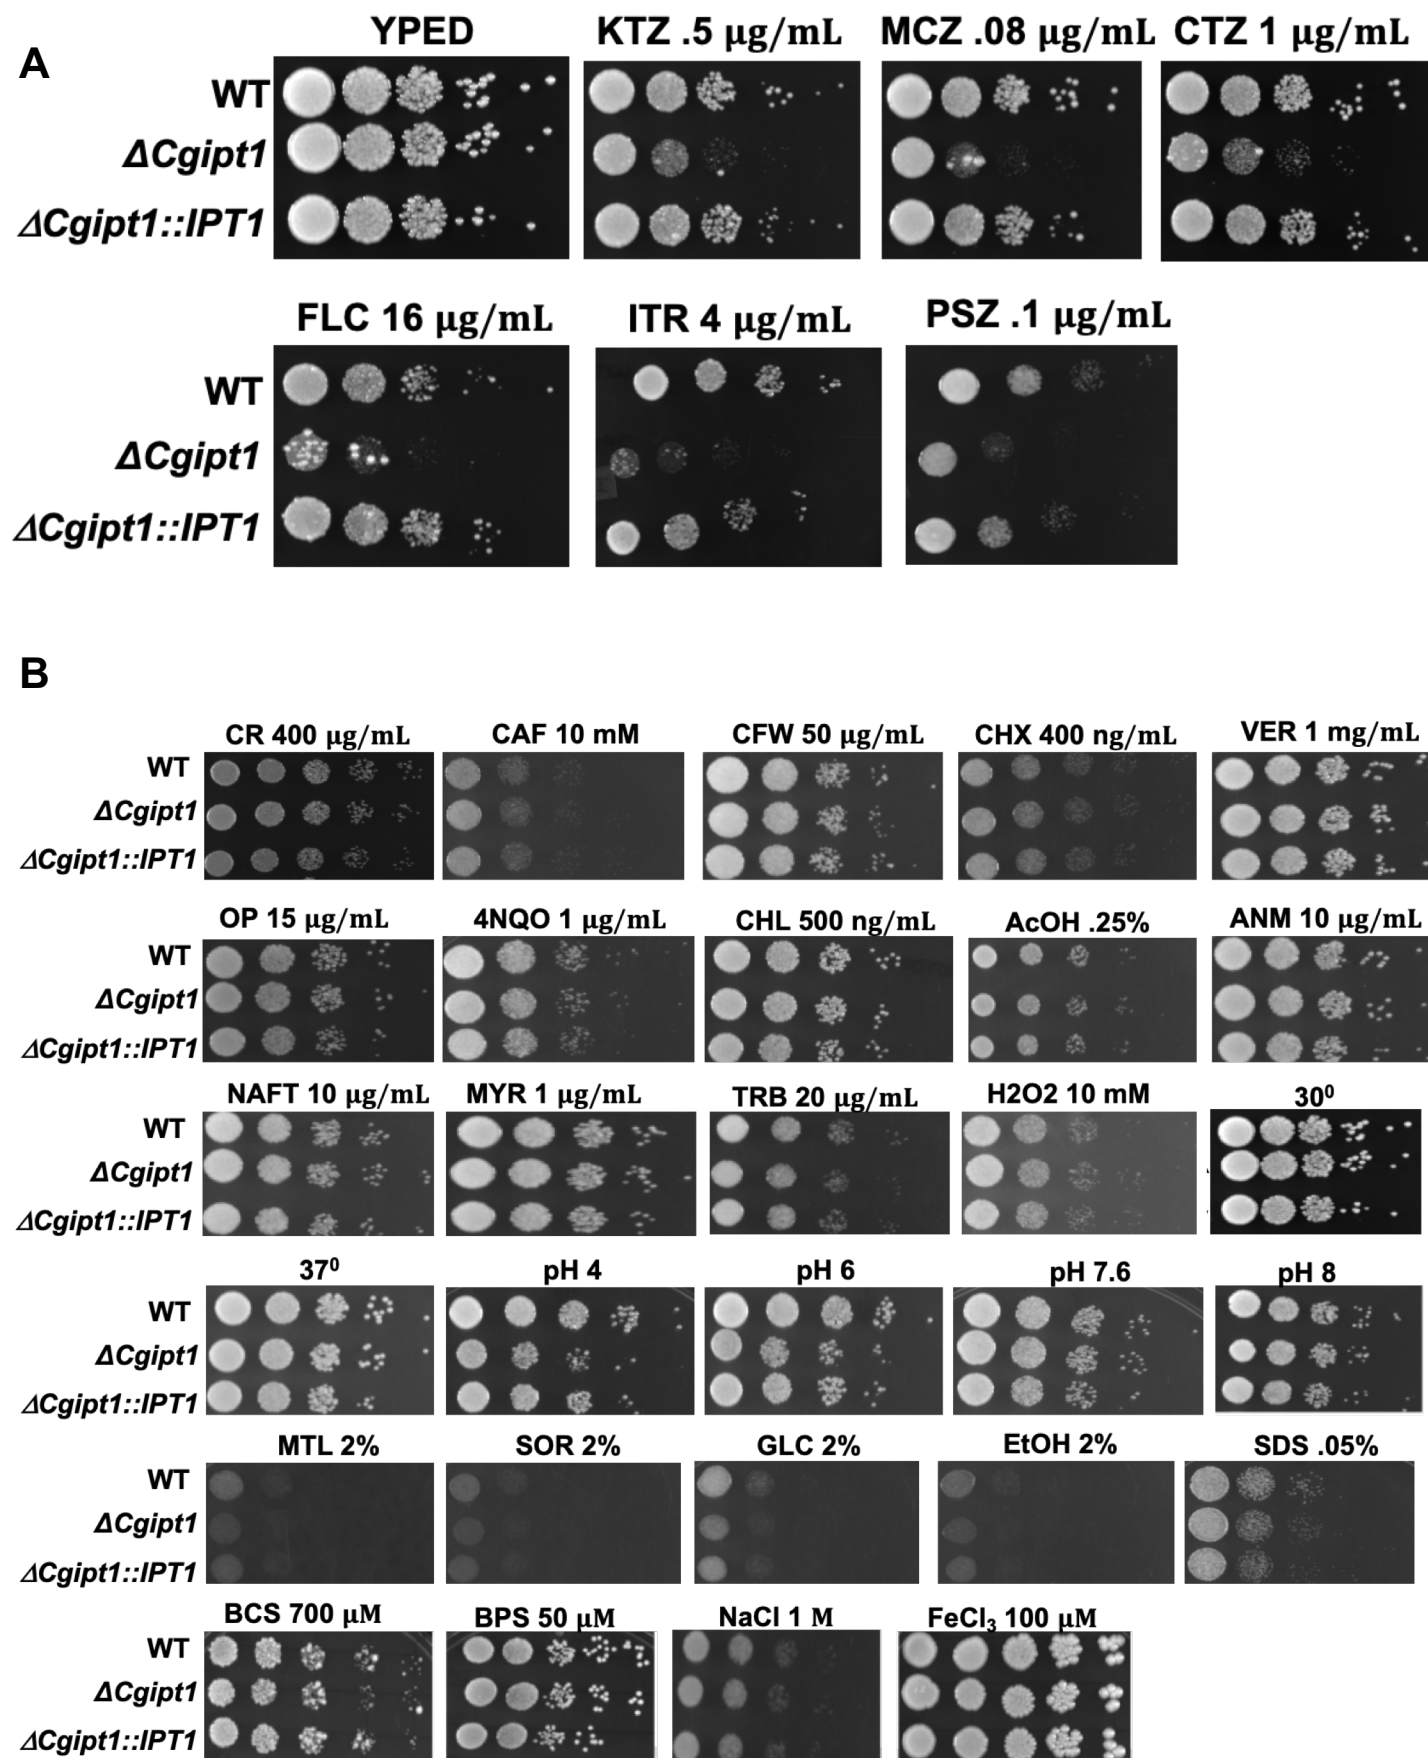

Supplement: s1 [file s1]

**Figure S3**

**A**

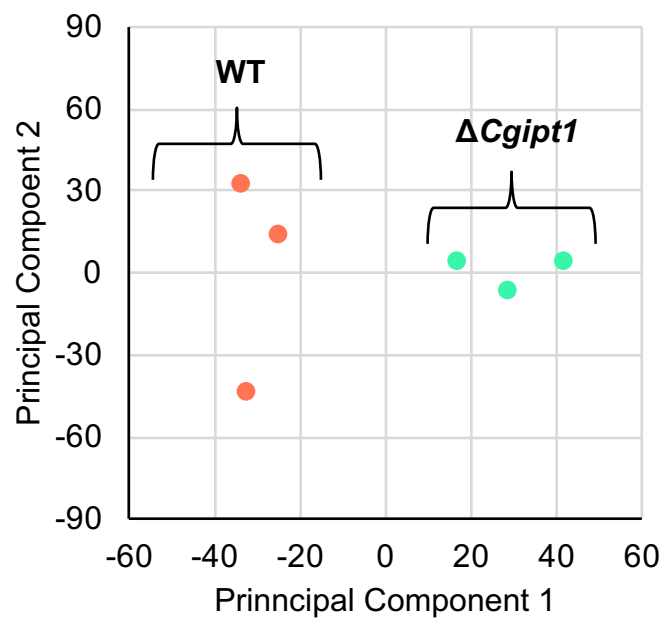

**B**

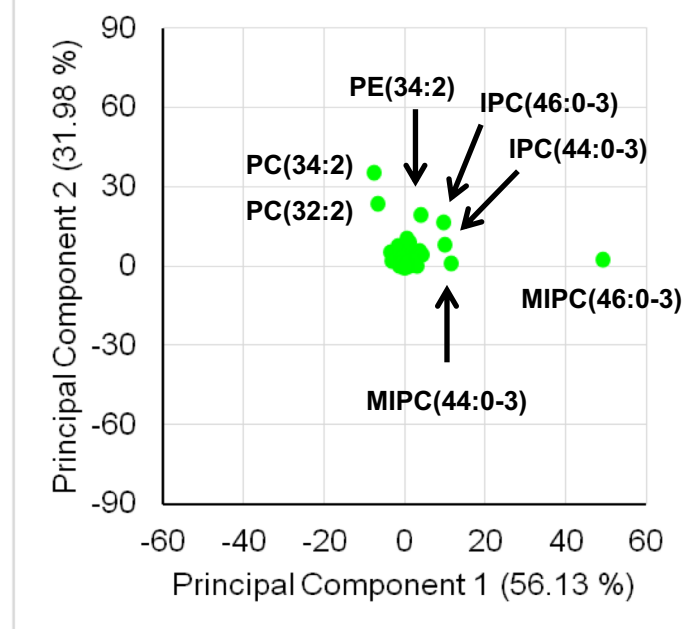

Supplement: s1 [file s1]

**Figure S2**

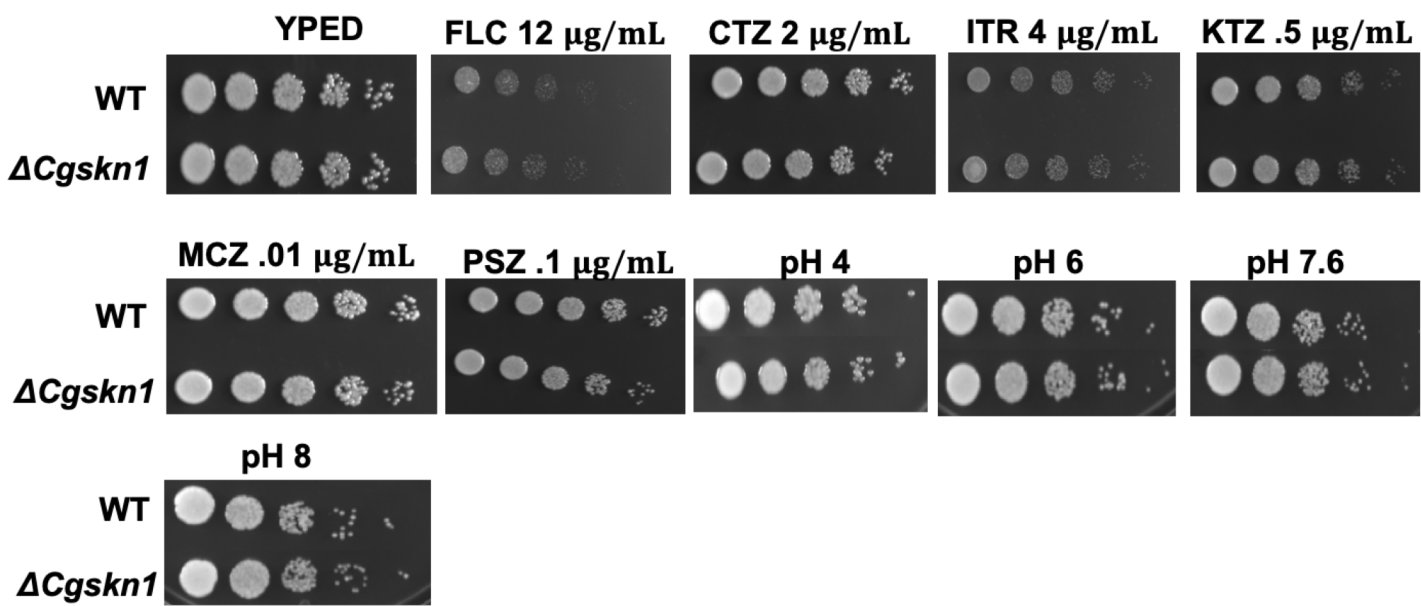

Supplement: s1 [file s1]
